# Supplementary material for: Simplified and rapid determination of Ca, K, Mg, and Na in fruit juices by flowing liquid cathode atmospheric glow discharge optical emission spectrometry
Source: Royal Society of Chemistry journal article supplement (doi:10.1039/d1ja00127b), 2021-01-01
Supplement: d1ja00127b1.pdf [file d1ja00127b1.pdf]

*Supporting Information*

**Simplified and rapid determination of Ca, K, Mg, and Na in fruit juices by flowing liquid cathode atmospheric glow discharge optical emission spectrometry**

Monika Gorska\*, Pawel Pohl

*Wroclaw University of Science and Technology, Faculty of Chemistry, Division of Analytical Chemistry and Chemical Metallurgy, Wybrzeze Stanislaw Wyspianskiego 27, 50-370 Wroclaw, Poland*

\* Corresponding author. E-mail address: monika.gorska@pwr.edu.pl (Monika Gorska)

Table SI-1. Agilent 5110 SVDV ICP OES operating parameters.

|                                                |                                               |
|------------------------------------------------|-----------------------------------------------|
| RF power (kW)                                  | 1.50                                          |
| Plasma Ar flow rate (L min <sup>-1</sup> )     | 12.0                                          |
| Nebulizing Ar flow rate (L min <sup>-1</sup> ) | 0.7                                           |
| Auxiliary Ar flow rate (L min <sup>-1</sup> )  | 1.0                                           |
| Uptake delay time (s)                          | 10                                            |
| Read time (s)                                  | 5                                             |
| Number of replicates                           | 3                                             |
| Stabilization time (s)                         | 15                                            |
| Viewing mode                                   | SVDS                                          |
| Viewing height (mm)                            | 8                                             |
| Pump speed (rpm)                               | 12                                            |
| Background correction                          | Off-peak, fitted, 2 pixels                    |
| Analytical line (nm)                           | 280.3 (Mg), 422.7 (Ca), 589.6 (Na), 766.5 (K) |

Table SI-2. The content of Ca and Mg determined in the analyzed juice samples, *i.e.*, apple (AT), banana (BX), blackcurrant (CF), lemon (LE), lime (ME), pomegranate (PH), quince (QK), and tomato (TT) juices, using simple standard solutions for calibration.

| Juice | Method       | Ca           |         | Mg          |         |
|-------|--------------|--------------|---------|-------------|---------|
|       |              | Mean±CI      | RSD (%) | Mean±CI     | RSD (%) |
| AP    | ICP OES      | 43.11±0.67   | 0.62    | 45.17±0.12  | 0.10    |
|       | FLC APGD     | 47.04±0.94   | 0.81    | 24.03±1.07  | 1.79    |
|       | Recovery (%) | 109          |         | 53.2        |         |
| BX    | ICP OES      | 18.41±2.58   | 5.67    | 70.35±0.67  | 0.39    |
|       | FLC APGD     | 28.94±1.29   | 1.80    | 37.87±3.40  | 3.62    |
|       | Recovery (%) | 157          |         | 53.8        |         |
| CF    | ICP OES      | 106.38±0.97  | 0.37    | 30.55±0.10  | 0.14    |
|       | FLC APGD     | 103.67±0.25  | 0.10    | 16.78±0.32  | 0.78    |
|       | Recovery (%) | 97.5         |         | 54.9        |         |
| LE    | ICP OES      | 196.25±41.93 | 8.60    | 125.15±0.89 | 0.29    |
|       | FLC APGD     | 204.79±10.63 | 2.09    | 61.06±3.40  | 2.24    |
|       | Recovery (%) | 104          |         | 48.8        |         |
| ME    | ICP OES      | 217.34±3.23  | 0.60    | 107.25±1.69 | 0.63    |
|       | FLC APGD     | 172.65±9.02  | 2.10    | 60.9±2.61   | 1.72    |
|       | Recovery (%) | 79.4         |         | 56.8        |         |
| PH    | ICP OES      | 96.42±1.09   | 0.46    | 78.33±0.84  | 0.43    |
|       | FLC APGD     | 70.58±2.01   | 1.15    | 42.65±4.74  | 4.48    |
|       | Recovery (%) | 73.2         |         | 54.5        |         |
| QK    | ICP OES      | 258.67±10.53 | 1.64    | 113.35±1.04 | 0.37    |
|       | FLC APGD     | 235.41±8.37  | 1.43    | 57.35±1.89  | 1.32    |
|       | Recovery (%) | 91.0         |         | 50.6        |         |
| TT    | ICP OES      | 106.63±1.37  | 0.52    | 105.26±2.14 | 0.82    |
|       | FLC APGD     | 77.22±5.69   | 2.97    | 54.79±1.19  | 0.87    |
|       | Recovery (%) | 72.4         |         | 52.0        |         |

CI – confidence interval (for 95% confidence level).
